# Supplementary material for: Efficacy of TIPS plus extrahepatic collateral embolisation in real-world data: a validation study
Source: PubMed Central journal article supplement — BMJ Open Gastroenterol. 2024 Feb 23;11(1):e001310. doi: 10.1136/bmjgast-2023-001310 (PMC10895241; doi:10.1136/bmjgast-2023-001310), 2024-02-23
Supplement: bmjgast-2023-001310supp001.pdf [file bmjgast-2023-001310supp001.pdf]

### List of Supplementary Materials

|                                                                                                                                                            |           |
|------------------------------------------------------------------------------------------------------------------------------------------------------------|-----------|
| <b>Supplementary Figure 1 Flow chart of patient selection .....</b>                                                                                        | <b>1</b>  |
| <b>Supplementary Table 1. Demographic and Baseline characteristics of patients with TIPS±E before and after PSM .....</b>                                  | <b>2</b>  |
| <b>Supplementary Table 2 propensity-score methods for TIPS VS TIPS + E.....</b>                                                                            | <b>6</b>  |
| <b>Supplementary Table 3 propensity-score methods for embolization of GV and GV+SPSS .....</b>                                                             | <b>7</b>  |
| <b>Supplementary Table 4 The prognostic models and predictive values by machine learning algorithm and traditional regression (Ranking by AUROC) .....</b> | <b>8</b>  |
| <b>Supplementary Figure 2 different pPPG groups of clinical outcomes.....</b>                                                                              | <b>10</b> |

**Supplementary Figure 1 Flow chart of patient selection**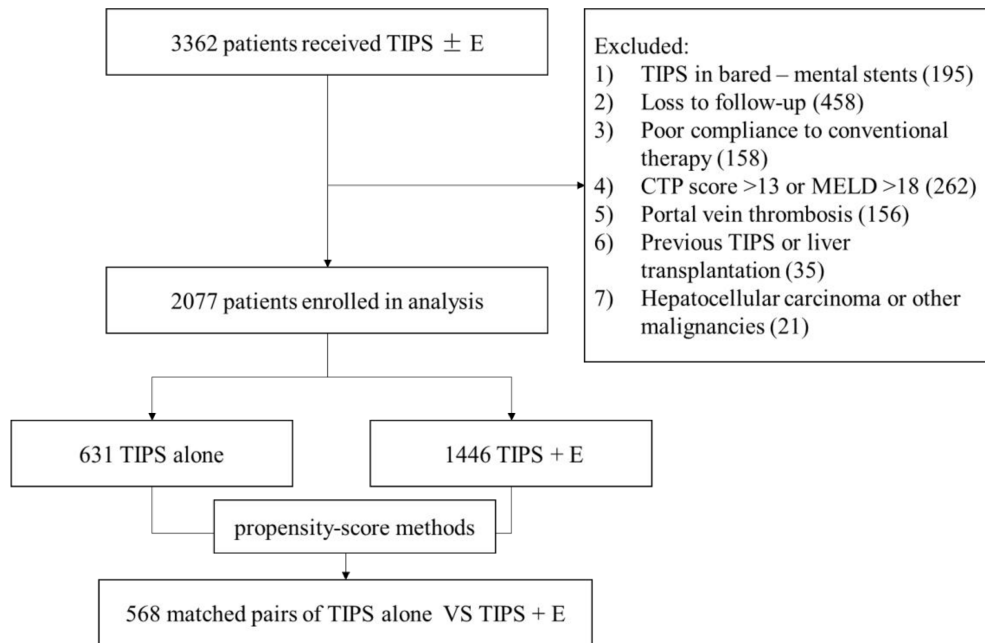

CTP, Child-Turcotte-Pugh; MELD, model for end-stage liver disease; TIPS, transjugular intrahepatic portosystemic shunt; TIPS + E, transjugular intrahepatic portosystemic shunt plus extrahepatic collateral embolization

**Supplementary Table 1. Demographic and Baseline characteristics of patients with TIPS±E before and after PSM**

| Characteristics          | Before PSM         |                   |                     | P    | After PSM         |                   |      |
|--------------------------|--------------------|-------------------|---------------------|------|-------------------|-------------------|------|
|                          | Overall (n = 2077) | TIPS (n = 631)    | TIPS + E (n = 1446) |      | TIPS (n = 568)    | TIPS+E (n = 568)  | P    |
| Age(years)               | 52.0 (44.0, 60.0)  | 53.0 (45.0, 61.0) | 51.0 (44.0, 60.0)   | 0.04 | 52.0 (45.0, 60.0) | 52.5 (45.0, 61.0) | 0.88 |
| Gender(M/F)              | 1335/742           | 383/248           | 952/494             | 0.03 | 354/214           | 360/208           | 0.71 |
| Etiology of cirrhosis    |                    |                   |                     |      |                   |                   |      |
| Virus                    | 1400 (67.4%)       | 440 (69.7%)       | 960 (66.4%)         | 0.30 | 403 (71.0%)       | 371 (65.3%)       | 0.07 |
| Alcoholic                | 124 (6.0%)         | 33 (5.3%)         | 91 (6.3%)           |      | 28 (4.9%)         | 42 (7.4%)         |      |
| Others                   | 553 (26.6%)        | 158 (25.0%)       | 395 (27.3%)         |      | 137 (24.1%)       | 155 (27.3%)       |      |
| PLT (10 <sup>9</sup> /L) | 60.0 (41.5, 88.0)  | 60.0 (40.0, 99.0) | 59.0 (42.0, 85.3)   | 0.11 | 60.0 (40.0, 95.8) | 64.0 (44.0, 93.0) | 0.24 |
| Hb (g/L)                 | 81.0 (70.0, 95.0)  | 81.0 (70.0, 96.0) | 81.0 (70.0, 95.0)   | 0.38 | 82.0 (71.0, 96.0) | 82.0 (70.0, 95.0) | 0.40 |
| Alb (g/L)                | 33.8 (30.3, 37.4)  | 34.0 (31.0, 37.4) | 33.6 (30.0, 37.4)   | 0.22 | 34.2 (30.9, 37.5) | 33.6 (30.2, 37.5) | 0.39 |
| TBIL (μmol/L)            | 20.9 (14.4, 30.0)  | 20.0 (13.8, 30.4) | 21.4 (14.7, 30.4)   | 0.12 | 20.5 (14.1, 29.1) | 20.8 (14.4, 29.9) | 0.41 |
| Cr (μmol/L)              | 73.0 (59.0, 88.0)  | 73.0 (59.0, 89.0) | 73.0 (59.0, 88.0)   | 0.53 | 75.5 (61.0, 90.0) | 74.0 (60.0, 90.0) | 0.40 |

|                          |                   |                   |                   |      |                   |                   |      |
|--------------------------|-------------------|-------------------|-------------------|------|-------------------|-------------------|------|
| INR                      | 1.30 (1.18, 1.45) | 1.31 (1.19, 1.47) | 1.31 (1.19, 1.47) | 0.14 | 1.31 (1.18, 1.47) | 1.29 (1.18, 1.44) | 0.23 |
| CTP Score                | 7.0 (6.0, 8.0)    | 7.0 (6.0, 8.0)    | 7.0 (6.0, 8.0)    | 0.44 | 7.0 (6.0, 8.0)    | 7.0 (6.0, 8.0)    | 0.39 |
| CTP Grade                |                   |                   |                   |      |                   |                   |      |
| A                        | 810 (39.0%)       | 253 (40.1%)       | 557 (38.5%)       | 0.68 | 235 (41.4%)       | 214 (37.7%)       | 0.38 |
| B                        | 1061 (51.1%)      | 320 (50.7%)       | 741 (51.2%)       |      | 277 (48.8%)       | 300 (52.8%)       |      |
| C                        | 206 (9.9%)        | 58 (9.2%)         | 148 (10.2%)       |      | 56 (9.9%)         | 54 (9.5%)         |      |
| MELD score               | 11.0 (9.0, 13.0)  | 11.0 (9.0, 13.0)  | 11.0 (9.0, 13.0)  | 0.35 | 11.0 (9.0, 13.0)  | 11.0 (9.0, 13.0)  | 0.61 |
| Ascites                  |                   |                   |                   |      |                   |                   |      |
| +                        | 1399 (67.4%)      | 427 (67.7%)       | 972 (67.2%)       | 0.84 | 381 (67.1%)       | 385 (67.8%)       | 0.80 |
| -                        | 678 (32.6%)       | 204 (32.3%)       | 474 (32.8%)       |      | 187 (32.9%)       | 183 (32.2%)       |      |
| HE                       |                   |                   |                   |      |                   |                   |      |
| +                        | 21 (1.0%)         | 7 (1.1%)          | 14 (1.0%)         | 0.77 | 5 (0.9%)          | 5 (0.9%)          | 1.00 |
| -                        | 2056 (99.0%)      | 624 (98.9%)       | 1432 (99.0%)      |      | 563 (99.1%)       | 563 (99.1%)       |      |
| Varices classification   |                   |                   |                   |      |                   |                   |      |
| (Sarin's classification) |                   |                   |                   | 0.00 |                   |                   | 0.08 |
| EV                       | 681 (32.8%)       | 202 (32.0%)       | 461 (21.9%)       |      | 188 (33.1%)       | 154 (27.1%)       |      |

|                         |                   |                   |                   |       |                   |                   |      |
|-------------------------|-------------------|-------------------|-------------------|-------|-------------------|-------------------|------|
| GOV 1                   | 705 (33.9%)       | 244 (38.7%)       | 479 (33.1%)       |       | 228 (40.1%)       | 268 (47.2%)       |      |
| GOV 2                   | 244 (11.7%)       | 86 (13.6%)        | 158 (10.9%)       |       | 68 (12.0%)        | 65 (11.4%)        |      |
| IGV 1                   | 447 (21.5%)       | 99 (15.7%)        | 348 (24.1%)       |       | 84 (14.8%)        | 81 (14.3%)        |      |
| Timing of TIPS          |                   |                   |                   |       |                   |                   |      |
| Acute variceal bleeding | 310 (14.9%)       | 84 (13.3%)        | 226 (15.6%)       | 0.17  | 80 (14.1%)        | 88 (15.5%)        | 0.50 |
| Secondary prevention    | 1767 (85.1%)      | 547 (86.7%)       | 1220 (84.4%)      |       | 488 (85.9%)       | 480 (84.5%)       |      |
| PPG, mmHg               | 24.0 (20.0, 27.3) | 23.5 (19.3, 27.2) | 24.0 (20.6, 27.9) | 0.04  | 23.5 (19.9, 27.3) | 24.0 (20.0, 27.9) | 0.41 |
| pPPG, mmHg              | 8.8 (6.0, 11.0)   | 8.1 (5.9, 10.4)   | 8.8 (6.5, 11.0)   | 0.002 | 8.0 (5.9, 10.3)   | 8.1 (6.0, 11.0)   | 0.24 |
| PPG%                    | 64.0 (53.3, 73.1) | 65.2 (54.5, 74.1) | 63.6 (52.6, 72.4) | 0.02  | 66.5 (55.6, 74.9) | 65.6 (54.8, 73.5) | 0.34 |
| Stent diameters         |                   |                   |                   |       |                   |                   |      |
| 6mm                     | 91 (4.4%)         | 73 (11.6%)        | 18 (1.2%)         | 0.00  | 16 (2.8%)         | 18 (3.2%)         | 0.93 |
| 8mm                     | 1886 (90.8%)      | 537 (85.1%)       | 1349 (93.3%)      |       | 531 (93.5%)       | 528 (93.0%)       |      |
| 10mm                    | 100 (4.8%)        | 21 (25.9%)        | 79 (5.5%)         |       | 21 (3.7%)         | 22 (3.9%)         |      |
| Hemodynamic success     |                   |                   |                   |       |                   |                   |      |
| +                       | 1843 (88.7%)      | 568 (90.0%)       | 1275 (88.2%)      | 0.22  | 517 (91.0%)       | 514 (90.5%)       | 0.76 |
| -                       | 234 (11.3%)       | 63 (10.0%)        | 171 (11.8%)       |       | 51 (9.0%)         | 54 (9.5%)         |      |

---

|                |                   |                   |                   |       |                   |                   |      |
|----------------|-------------------|-------------------|-------------------|-------|-------------------|-------------------|------|
| Follow-up time | 32.5 (19.3, 56.6) | 29.9 (16.2, 59.5) | 33.7 (20.5, 54.9) | 0.049 | 32.6 (18.7, 63.6) | 33.8 (20.4, 56.0) | 0.87 |
|----------------|-------------------|-------------------|-------------------|-------|-------------------|-------------------|------|

---

Data were presented by median (lower quartile, upper quartile). PSM, propensity score matching; PLT, platelet; Alb, albumin; TBIL, total bilirubin; INR, international normalized ratio; Hb, hemoglobin; Cr, Creatinine; CTP, Child-Turcotte-Pugh; HE, hepatic encephalopathy; PPG, portal pressure gradient; pPPG, post-TIPS portal pressure gradient; MELD, model for end-stage liver disease; TIPS, transjugular intrahepatic portosystemic shunt; TIPS + E, transjugular intrahepatic portosystemic shunt plus extrahepatic collateral embolization.

**Supplementary Table 2 propensity-score methods for TIPS VS TIPS + E**

| Variables in logistics regression | B              | P       | Exp(B) |
|-----------------------------------|----------------|---------|--------|
| Centers                           | 0.015          | 0.676   | 1.015  |
| Gender                            | 0.288          | 0.019   | 1.334  |
| age                               | 0.002          | 0.717   | 1.002  |
| Etiology                          | 0.205          | 0.046   | 1.228  |
| CTP                               | -0.239         | 0.014   | 0.788  |
| MELD                              | -0.041         | 0.145   | 0.960  |
| Varices classification            | 0.200          | 0.000   | 1.222  |
| TIPS indication                   | 0.114          | 0.447   | 1.120  |
| PPG                               | 0.008          | 0.704   | 1.008  |
| pPPG                              | 0.007          | 0.905   | 1.007  |
| PPG %                             | 0.008          | 0.807   | 1.005  |
| stents diameters                  | 1.559          | 0.000   | 4.755  |
| follow up time                    | 0.000          | 0.642   | 1.000  |
| Match types                       | exact match    | 0.000   |        |
|                                   | fuzzy matching | 568.000 |        |
| PSSS                              | 0.200          |         |        |
| matching attempt count            | 129990.000     |         |        |
| incremental rejection percentage  | 99.561         |         |        |

**Supplementary Table 3 propensity-score methods for embolization of GV and GV+SPSS**

| Variables in logistics regression | B              | P      | Exp(B) |
|-----------------------------------|----------------|--------|--------|
| Centers                           | 1.248          | 0.035  | 0.287  |
| Gender                            | 0.027          | 0.941  | 1.027  |
| age                               | -0.009         | 0.564  | 0.991  |
| Etiology                          | -0.720         | 0.023  | 0.487  |
| CTP                               | 0.807          | 0.005  | 2.240  |
| MELD                              | -0.312         | 0.022  | 0.732  |
| Varices classification            | 2.696          | 0.000  | 14.816 |
| TIPS indication                   | -0.162         | 0.676  | 0.851  |
| PPG                               | 0.017          | 0.818  | 1.017  |
| pPPG                              | -0.152         | 0.468  | 0.859  |
| PPG%                              | 0.082          | 0.598  | 1.003  |
| Stents diameters                  | -0.143         | 0.480  | 0.867  |
| followup                          | 0.000          | 0.203  | 1.000  |
| Match types                       | exact match    | 0.000  |        |
|                                   | fuzzy matching | 65.000 |        |
| PSSS                              | 0.020          |        |        |
| matching attempt count            | 18543.000      |        |        |
| incremental rejection percentage  | 99.694         |        |        |



**Supplementary Table 4 The prognostic models and predictive values by machine learning algorithm and traditional regression (Ranking by AUROC)**

| Outcomes   | Model                     | Accuracy             | AUC                  | Sensitivity          | Specificity          |
|------------|---------------------------|----------------------|----------------------|----------------------|----------------------|
| Rebleeding | Random Forests            | 0.851 (0.803, 0.899) | 0.863 (0.839, 0.887) | 0.851 (0.887, 0.827) | 0.852 (0.827, 0.875) |
|            | Support Vector Machine    | 0.712 (0.771, 0.853) | 0.802 (0.778, 0.826) | 0.833 (0.826, 0.809) | 0.847 (0.809, 0.857) |
|            | Artificial neural network | 0.723 (0.782, 0.864) | 0.835 (0.811, 0.859) | 0.798 (0.859, 0.774) | 0.836 (0.774, 0.822) |
|            | Logistic Regression       | 0.801 (0.750, 0.860) | 0.790 (0.764, 0.817) | 0.787 (0.758, 0.814) | 0.778 (0.747, 0.807) |
|            | Cox Regression            | 0.594 (0.582, 0.605) | 0.767 (0.748, 0.785) | 0.819 (0.800, 0.838) | 0.628 (0.616, 0.639) |
| HE         | Random Forests            | 0.801 (0.760, 0.842) | 0.713 (0.689, 0.737) | 0.362 (0.737, 0.338) | 0.957 (0.338, 0.386) |
|            | Support Vector Machine    | 0.752 (0.711, 0.793) | 0.693 (0.669, 0.717) | 0.287 (0.717, 0.263) | 0.866 (0.263, 0.311) |
|            | Artificial neural network | 0.733 (0.692, 0.774) | 0.673 (0.649, 0.697) | 0.212 (0.697, 0.188) | 0.775 (0.188, 0.236) |
|            | Logistic Regression       | 0.661 (0.615, 0.707) | 0.674 (0.650, 0.698) | 0.877 (0.853, 0.897) | 0.682 (0.648, 0.715) |
|            | Cox Regression            | 0.684 (0.637, 0.730) | 0.606 (0.561, 0.650) | 0.877 (0.853, 0.898) | 0.682 (0.648, 0.716) |
| Survival   | Random Forests            | 0.83 (0.789, 0.871)  | 0.776 (0.752, 0.800) | 0.202 (0.17, 0.234)  | 0.363 (0.909, 0.957) |
|            | Support Vector Machine    | 0.716 (0.675, 0.757) | 0.765 (0.741, 0.789) | 0.883 (0.789, 0.859) | 0.697 (0.682, 0.712) |

|                           |                           |                      |                      |                      |                      |
|---------------------------|---------------------------|----------------------|----------------------|----------------------|----------------------|
|                           | Artificial neural network | 0.711 (0.67 ,0.752)  | 0.762 (0.738 ,0.786) | 0.778 (0.786 ,0.754) | 0.768 (0.754 ,0.802) |
|                           | Logistic Regression       | 0.694 (0.646, 0.742) | 0.756 (0.733, 0.779) | 0.735 (0.704, 0.764) | 0.806 (0.775, 0.833) |
|                           | Cox Regression            | 0.659 (0.637 ,0.681) | 0.653 (0.609 ,0.696) | 0.748 (0.689 ,0.807) | 0.684 (0.668 ,0.700) |
|                           | Random Forests            | 0.803 (0.762 ,0.844) | 0.896 (0.872 ,0.920) | 0.903 (0.92 ,0.879)  | 0.608 (0.879 ,0.927) |
|                           | Support Vector Machine    | 0.793 (0.752 ,0.834) | 0.756 (0.732 ,0.780) | 0.663 (0.78 ,0.639)  | 0.685 (0.639 ,0.687) |
| Further<br>decompensation | Artificial neural network | 0.762 (0.721 ,0.803) | 0.776 (0.752 ,0.800) | 0.754 (0.8 ,0.73)    | 0.765 (0.730 ,0.778) |
|                           | Logistic Regression       | 0.696 (0.652, 0.740) | 0.725 (0.703, 0.747) | 0.693 (0.661, 0.723) | 0.825 (0.795, 0.851) |
|                           | Cox Regression            | 0.638 (0.617 ,0.658) | 0.712 (0.681 ,0.742) | 0.694 (0.664 ,0.724) | 0.596 (0.582 ,0.609) |

RF, random forests; SVM, support vector machine; ANN, artificial neural network; LR, logistic regression; HE, hepatic encephalopathy;

AUROC, the area under the receiver operating characteristic curves;

## Supplementary Figure 2 different pPPG groups of clinical outcomes

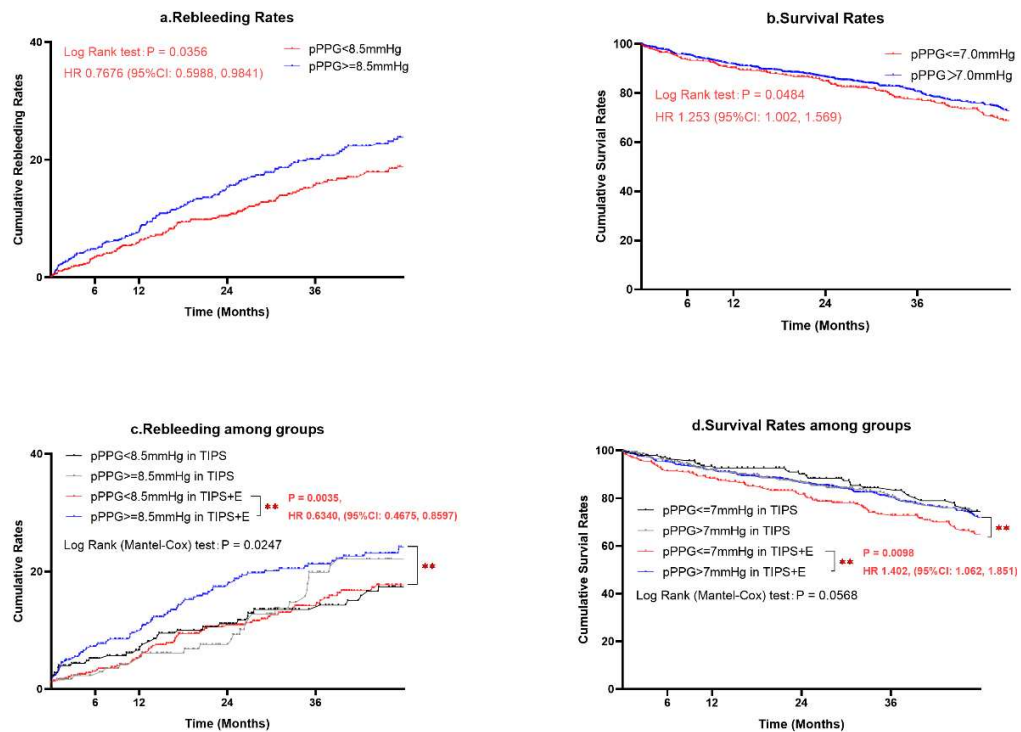

a. Rebleeding rates grouped by pPPG 8.5mmHg; b. Survival rates grouped by pPPG 7.0mmHg; c. Rebleeding rates grouped by pPPG 8.5mmHg and TIPS±E; d. Survival rates grouped by pPPG 7.0mmHg and TIPS±E;
